# Supplementary material
Source: PubMed Central journal article supplement (PMC11028318)
Supplement: 262_2018_2129_MOESM1_ESM.pdf [file 262_2018_2129_MOESM1_ESM.pdf]

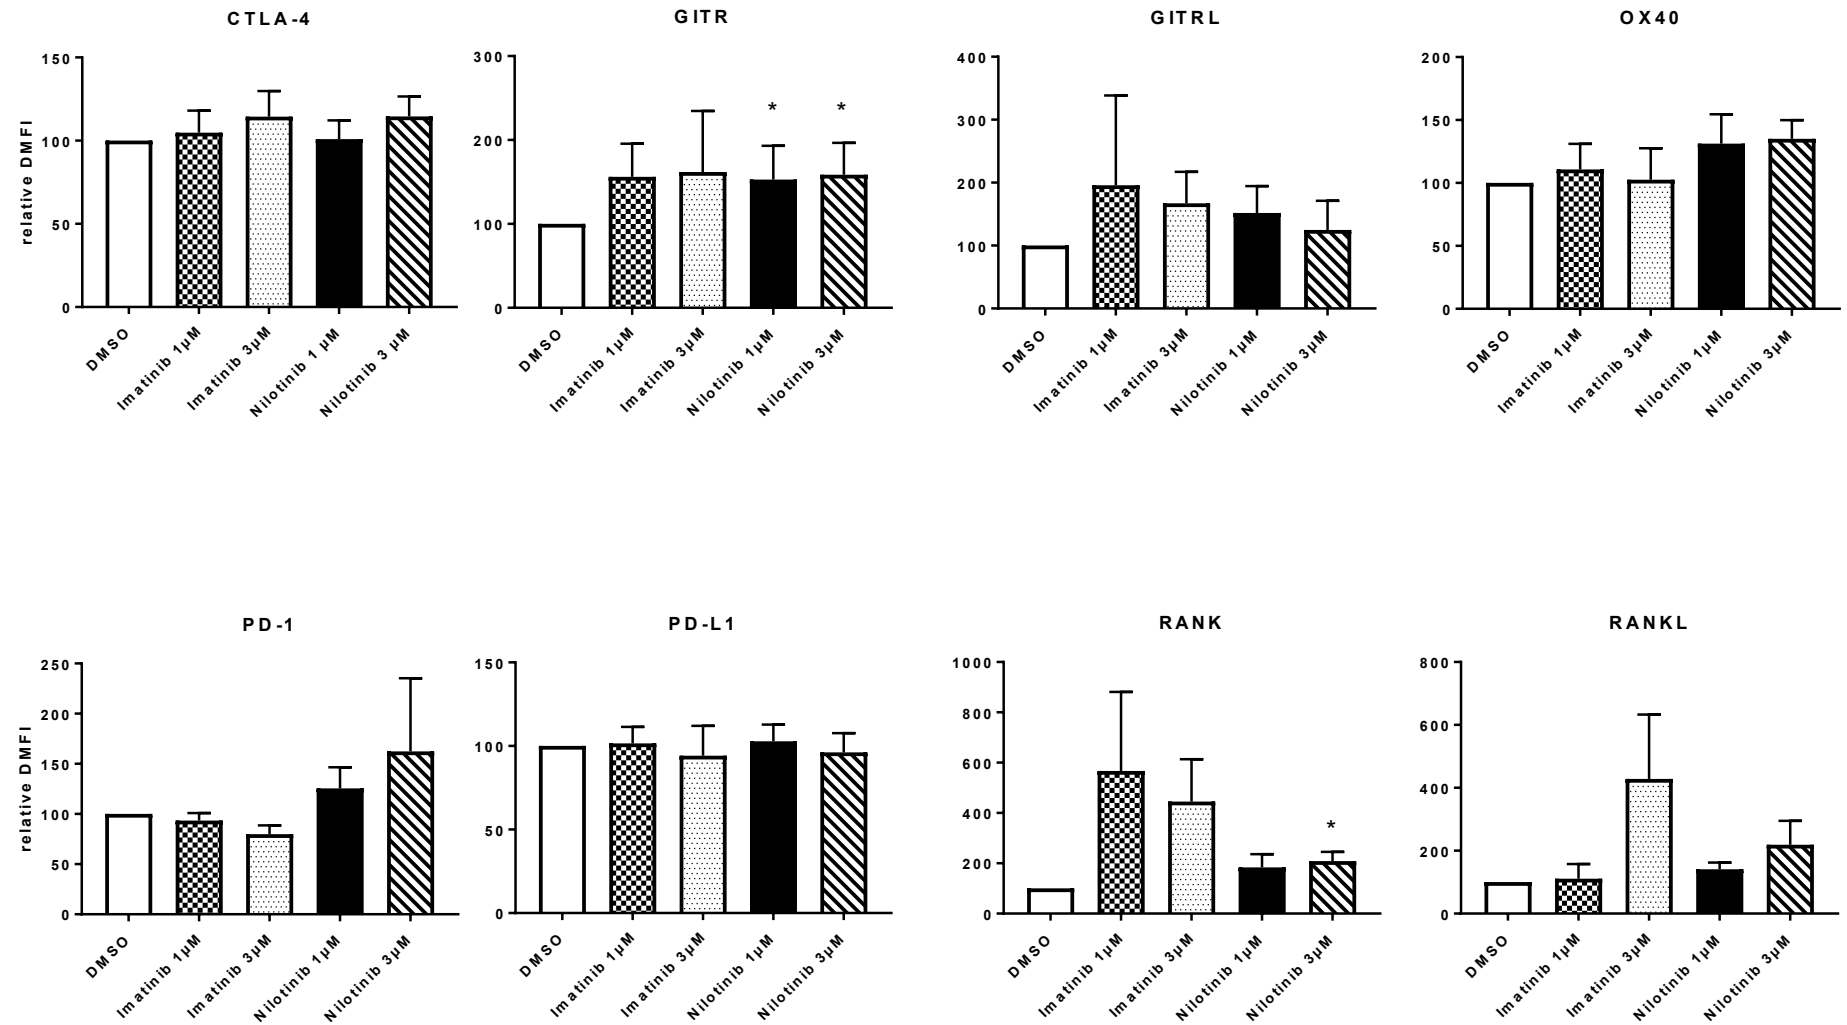

**Supplementary Figure 1: Nilotinib significantly alters expression of immunoregulatory molecules on DCs.**

Peripheral blood monocytes were cultured with GM-CSF and IL-4, exposed to imatinib or nilotinib as indicated for 7 days and stimulated with LPS 24 hours before cell harvest. Effects of TKI on immunoregulatory molecules on DCs were analyzed by FACS. DMFI levels of cells treated with the vehicle control DMSO (white column) were set to 100 in each individual data set. Results of data of at least 4 independent donors are shown.
